# Supplementary material
Source: PubMed Central journal article supplement (PMC122328)
Supplement: pnas_99_4_2118__9.pdf [file pnas_99_4_2118__9.pdf]

**Fig. 5.** Schematic representation of the application of proband-based rules to identify genes whose expression correlates negatively with or is not temporally congruent with, expression of a proband. (A) Negative correlation. The correlation coefficient between the expression profiles of a proband gene (red) and a tested gene (blue) is less than 0. The  $x$  axis represents time and the  $y$  axis represents the expression level relative to a control. The red and blue lines designate the expression profiles of the proband and correlated gene, respectively. (B) Expression profiles that anticipate (green curve) or (blue curve) the profile of the proband. The calculation used the generalized correlation coefficient

$$C_{xy}(\tau) = \frac{N \sum X(t+\tau)Y(t) - (\sum X(t+\tau))(\sum Y(t))}{\sqrt{[(N \sum X(t)^2) - (\sum X(t))^2][(N \sum Y(t)^2) - (\sum Y(t))^2]}}$$

where  $\tau$  is the time shift between the expression profiles [Bracewell, R. N. (1995) *Two-Dimensional Imaging* (Prentice-Hall, Englewood Cliffs, NJ)].
