# Supplementary material
Source: PubMed Central journal article supplement (PMC122328)
Supplement: pnas_99_4_2118__14.pdf [file pnas_99_4_2118__14.pdf]

**Table 1. GABRIEL's rule explanation function (REF)**

| <b>Gene Name</b> | <b><math>&gt; -1</math><br/>at 15<br/>min?</b> | <b><math>&gt; 0</math> at<br/>30<br/>min?</b> | <b><math>&gt; 1</math> at<br/>1hr?</b> | <b><math>&gt; 0</math> at<br/>2 hr?</b> | <b><math>&gt; -1</math><br/>and <math>&lt;</math><br/>2 at 4<br/>hr?</b> | <b><math>&gt; -1</math><br/>and<br/><math>&lt; 1</math> at<br/>6 hr?</b> | <b><math>&gt; -1</math><br/>and <math>&lt;</math><br/>1 at 8<br/>hr?</b> | <b><math>&gt; -1</math><br/>and<br/><math>&lt; 1</math><br/>at 12<br/>hr?</b> | <b><math>&gt; -1</math><br/>and <math>&lt;</math><br/>1 at 16<br/>hr?</b> | <b><math>&gt; -1</math><br/>and <math>&lt;</math><br/>1 at 20<br/>hr?</b> | <b><math>&gt; -1</math><br/>and <math>&lt;</math><br/>1 at 24<br/>hr?</b> |
|------------------|------------------------------------------------|-----------------------------------------------|----------------------------------------|-----------------------------------------|--------------------------------------------------------------------------|--------------------------------------------------------------------------|--------------------------------------------------------------------------|-------------------------------------------------------------------------------|---------------------------------------------------------------------------|---------------------------------------------------------------------------|---------------------------------------------------------------------------|
| SID381836<br>EST | 1.269,<br>True                                 | 2.275,<br>True                                | 2.457,<br>True                         | 0.014,<br>True                          | -0.535,<br>True                                                          | -1.029,<br>False                                                         | -0.943,<br>True                                                          | -1.12,<br>False                                                               | -0.286,<br>True                                                           | -0.377,<br>True                                                           | -0.152,<br>True                                                           |
