# Supplementary material
Source: PubMed Central journal article supplement (PMC122328)
Supplement: pnas_99_4_2118__15.pdf [file pnas_99_4_2118__15.pdf]

**Table 2. Application of the rule explanation function (REF) to signal-to-noise ratio (SNR) analysis of output of the I/E pattern-based rule**

| <b>Gene Name</b>                  | <b>Ch1 Mean</b> | <b>Ch1 SD</b> | <b>Ch1 at 30 minutes</b> | <b>Ch2 at 30 minutes</b> | <b>Ch2(30 minutes) –Ch1 Mean &gt; 2 * Ch1 SD?</b> | <b>Ch1 at 1 hour</b> | <b>Ch2 at 1 hour</b> | <b>Ch2(30 minutes) –Ch1 Mean &gt; 2 * Ch1 SD?</b> |
|-----------------------------------|-----------------|---------------|--------------------------|--------------------------|---------------------------------------------------|----------------------|----------------------|---------------------------------------------------|
| SID512337<br>Ribosomal protein S5 | 577             | 679           | 2647                     | 3944                     | 3944 – 577 = 3367 > 2*679, True                   | 370                  | 1168                 | 1168 – 577 = 591 < 2*679, False                   |
