# Supplementary material
Source: PubMed Central journal article supplement (PMC122328)
Supplement: pnas_99_4_2118__16.pdf [file pnas_99_4_2118__16.pdf]

**Table 3. Application of the rule explanation function (REF) to interpret the disparate groupings make by the I/E response pattern-based rule vs. the results from Jun B proband-based rule**

| Gene Name                                                       | > -1<br>at 15<br>min? | >0 at<br>30<br>min? | >1 at<br>1hr?  | >0 at<br>2 hr? | >-1<br>and <<br>2 at 4<br>hr? | >-1<br>and<br><1 at<br>6 hr? | >-1<br>and <<br>1 at 8<br>hr? | >-1<br>and <<br>1 at<br>12<br>hr? | >-1<br>and <<br>1 at<br>16<br>hr? | >-1<br>and <<br>1 at<br>20<br>hr? | >-1<br>and <<br>1 at<br>24<br>hr? |
|-----------------------------------------------------------------|-----------------------|---------------------|----------------|----------------|-------------------------------|------------------------------|-------------------------------|-----------------------------------|-----------------------------------|-----------------------------------|-----------------------------------|
| Jun B proto-oncogene                                            | 1.183,<br>True        | 1.401,<br>True      | 2.676,<br>True | 3.002,<br>True | 1.74,<br>True                 | 0.911,<br>True               | 0.888,<br>True                | 0.214,<br>True                    | 0.138,<br>True                    | -<br>0.029,<br>True               | -<br>0.201,<br>True               |
| SERINE/THREONINE-PROTEIN KINASE SGK                             | 0.585,<br>True        | 1.239,<br>True      | 1.86,<br>True  | 1.722,<br>True | 0.422,<br>True                | 1.189,<br>False              | 0.864,<br>True                | 0.816,<br>True                    | 0.029,<br>True                    | -<br>0.014,<br>True               | 0.057,<br>True                    |
| Myeloid cell leukemia sequence 1 (BCL2-related)                 | 0.189,<br>True        | 1.098,<br>True      | 1.384,<br>True | 1.345,<br>True | 0.791,<br>True                | 1.138,<br>False              | 1.05,<br>False                | 0.239,<br>True                    | -<br>0.089,<br>True               | -<br>0.089,<br>True               | -0.12,<br>True                    |
| MAP KINASE PHOSPHATASE-1                                        | 1.17,<br>True         | 2.223,<br>True      | 2.989,<br>True | 2.57,<br>True  | 1.911,<br>True                | 2.157,<br>False              | 2.202,<br>False               | 1.281,<br>False                   | 0.895,<br>True                    | 0.651,<br>True                    | 0.333,<br>True                    |
| SID376394 Protein phosphatase 4 (formerly X), catalytic subunit | 1.367,<br>True        | 1.614,<br>True      | 1.891,<br>True | 1.876,<br>True | 1.281,<br>True                | 0.214,<br>True               | -<br>0.201,<br>True           | -0.69,<br>True                    | -<br>0.234,<br>True               | 0.111,<br>True                    | 0.07,<br>True                     |
| Mitogen induced nuclear orphan receptor (MINOR)                 | -0.12,<br>True        | 0.084,<br>True      | 2.722,<br>True | 2.546,<br>True | 2.43,<br>False                | 1.064,<br>False              | 0.556,<br>True                | 0.214,<br>True                    | -<br>0.136,<br>True               | -<br>0.269,<br>True               | -<br>0.286,<br>True               |
| IEX-1                                                           | -<br>0.304,<br>True   | 0.189,<br>True      | 2.16,<br>True  | 2.498,<br>True | 2.098,<br>False               | 1.373,<br>False              | 1.176,<br>False               | 0.029,<br>True                    | 0.151,<br>True                    | 0.227,<br>True                    | 0.163,<br>True                    |
| SERINE/THREONINE-PROTEIN KINASE SGK                             | 0.888,<br>True        | 1.057,<br>True      | 1.993,<br>True | 1.761,<br>True | 0.367,<br>True                | 1.183,<br>False              | 1.449,<br>False               | 1.111,<br>False                   | 0.263,<br>True                    | -<br>0.044,<br>True               | -<br>0.152,<br>True               |
| Myeloid cell leukemia sequence 1 (BCL2-related)                 | 0.202,<br>True        | 1.748,<br>True      | 2.111,<br>True | 1.683,<br>True | 2.208,<br>False               | 1.96,<br>False               | 1.275,<br>False               | 0.485,<br>True                    | 0.098,<br>True                    | -<br>0.014,<br>True               | 0.263,<br>True                    |
| MAP KINASE                                                      | 1.269,<br>True        | 1.836,<br>True      | 2.844,<br>True | 2.281,<br>True | 1.632,<br>True                | 1.84,<br>True                | 1.975,<br>True                | 1.189,<br>True                    | 1.131,<br>True                    | 1.111,<br>True                    | 1.157,<br>True                    |

|                                                                       |              |             |             |             |              |              |              |              |              |              |              |
|-----------------------------------------------------------------------|--------------|-------------|-------------|-------------|--------------|--------------|--------------|--------------|--------------|--------------|--------------|
| PHOSPHATASE-1                                                         | True         | True        | True        | True        | True         | False        | False        | False        | False        | False        | False        |
| MAP KINASE PHOSPHATASE-1                                              | 0.604, True  | 2.134, True | 2.814, True | 2.446, True | 1.551, True  | 1.967, False | 2.151, False | 1.263, False | 0.978, True  | 1.144, False | 0.84, True   |
| SID254436 IMMEDIATE-EARLY RESPONSE PROTEIN NOT                        | 0.014, True  | 2.242, True | 3.409, True | 1.585, True | 1.856, True  | 0.687, True  | 0.084, True  | -0.218, True | 0.74, True   | 0.614, True  | -0.322, True |
| Platelet-derived growth factor receptor, beta polypeptide             | 1.744, True  | 2.797, True | 2.269, True | 1.911, True | 1.888, True  | 1.651, False | 1.541, False | 1.014, False | 1.111, False | 0.986, True  | 0.678, True  |
| Endothelin 1 {alternative products}                                   | 0.454, True  | 1.036, True | 1.956, True | 1.778, True | 1.787, True  | 2.014, False | 2.014, False | 1.138, False | 0.536, True  | -0.252, True | -0.12, True  |
| DNA-binding protein CPBP (CPBP)                                       | 0.411, True  | 1.516, True | 1.618, True | 0.888, True | 0.963, True  | 0.911, True  | 0.807, True  | 0.526, True  | 0.214, True  | 0.433, True  | 0.566, True  |
| MAP KINASE PHOSPHATASE-1                                              | 0.379, True  | 1.475, True | 2.379, True | 1.561, True | 1.208, True  | 1.623, False | 1.47, False  | 0.903, True  | 0.824, True  | 0.731, True  | 0.782, True  |
| MAP KINASE PHOSPHATASE-1                                              | 1.064, True  | 1.753, True | 2.465, True | 2.29, True  | 1.609, True  | 1.709, False | 2.101, False | 1.444, False | 1.104, False | 1.036, False | 1.17, False  |
| Interleukin 6 (B cell stimulatory factor 2)                           | 0.722, True  | 1.595, True | 2.345, True | 3.521, True | 3.653, False | 3.384, False | 3.396, False | 1.774, False | 0.202, True  | -0.218, True | -0.218, True |
| Homo sapiens clone 23767 and 23782 mRNA sequences                     | 1.556, True  | 2.029, True | 1.454, True | 1.31, True  | 1.422, True  | 1.384, False | 1.104, False | 1.214, False | 0.422, True  | 0.433, True  | 0.299, True  |
| TGF-beta inducible early protein                                      | -0.044, True | 0.705, True | 1.868, True | 2.353, True | -0.12, True  | 0.88, True   | 1.411, False | 1.098, False | 0.31, True   | 0.299, True  | 0.07, True   |
| SID488548 Human pre-B cell enhancing factor (PBEF) mRNA, complete cds | 0.098, True  | 0.832, True | 1.454, True | 1.475, True | 1.628, True  | 1.941, False | 1.824, False | 0.848, True  | 0.111, True  | 0.057, True  | -0.269, True |
