# Supplementary material
Source: PubMed Central journal article supplement (PMC122328)

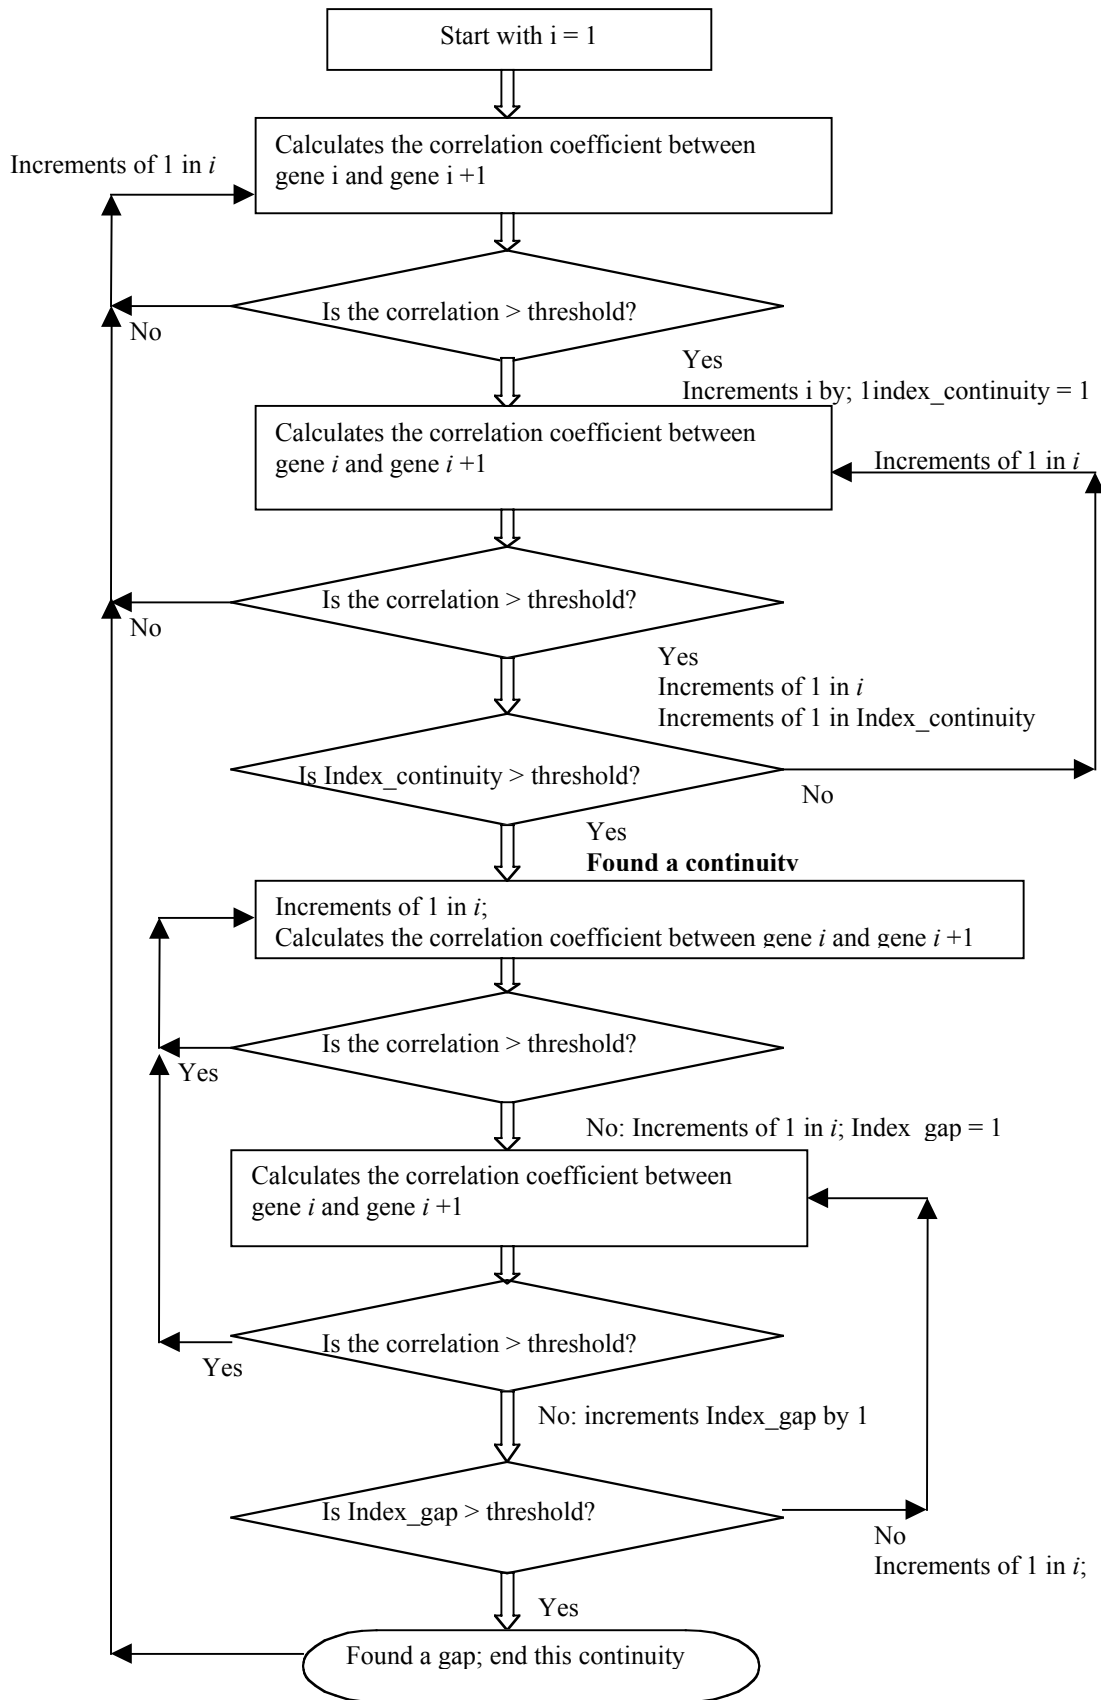

Supplement: pnas_99_4_2118__10.pdf [file pnas_99_4_2118__10.pdf]

**A**

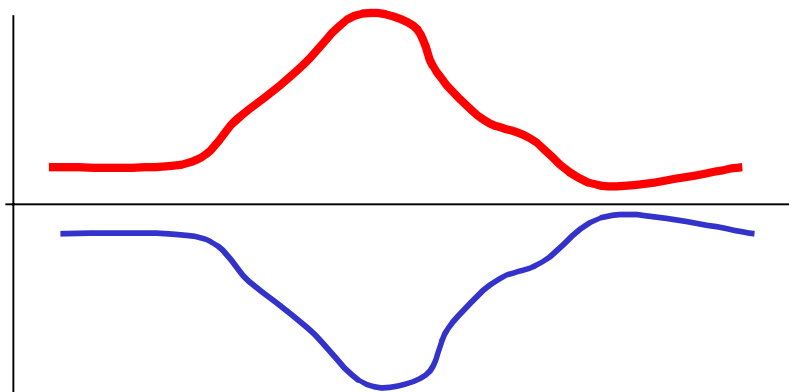

**B**

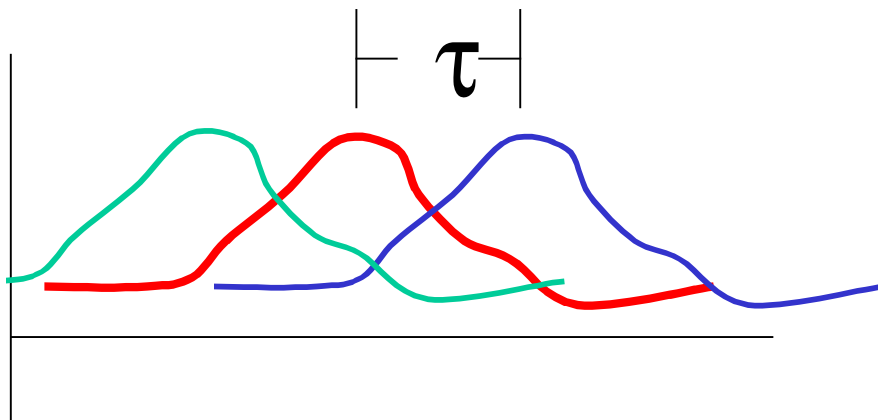

Supplement: pnas_99_4_2118__17.pdf [file pnas_99_4_2118__17.pdf]
